# Supplementary material for: An improved extraction chromatographic purification of tungsten from a silicate matrix for high precision isotopic measurements using MC-ICPMS
Source: Royal Society of Chemistry journal article supplement (doi:10.1039/c8ja00024g), 2018-01-01
Supplement: c8ja00024g1.pdf [file c8ja00024g1.pdf]

## Supplementary materials

**Table S1. Tungsten isotope results for Alfa Aesar W standard solution (50ppb) with different combinations of cones, For Alfa Aesar W standard,  $\epsilon^{182\text{W}/184\text{W}}$**

$$\epsilon^{182\text{W}/184\text{W}}(6/4) = [(^{182}\text{W}/^{184}\text{W}_{(6/4)} - ^{182}\text{W}/^{184}\text{W}_{(6/4)\text{ mean}}) / ^{182}\text{W}/^{184}\text{W}_{(6/4)\text{ mean}}] \times 10000, \epsilon^{182\text{W}/184\text{W}}(6/3) = [(^{182}\text{W}/^{184}\text{W}_{(6/3)} - ^{182}\text{W}/^{184}\text{W}_{(6/3)\text{ mean}}) / ^{182}\text{W}/^{184}\text{W}_{(6/3)\text{ mean}}] \times 10000$$

|                                                                       | $^{184}\text{W}$ | $^{182}\text{W}/^{184}\text{W}$<br>(6/4) | $2\sigma$ | $^{183}\text{W}/^{184}\text{W}$<br>(6/4) | $2\sigma$ | $^{184}\text{W}/^{183}\text{W}$<br>(6/3) | $2\sigma$ | $^{182}\text{W}/^{184}\text{W}$<br>(6/3) | $2\sigma$ | $\epsilon^{182\text{W}/184\text{W}}$<br>(6/4) | $2\sigma$ | $\epsilon^{182\text{W}/184\text{W}}$<br>(6/3) | $2\sigma$ |
|-----------------------------------------------------------------------|------------------|------------------------------------------|-----------|------------------------------------------|-----------|------------------------------------------|-----------|------------------------------------------|-----------|-----------------------------------------------|-----------|-----------------------------------------------|-----------|
| Standard<br>sample<br>cone + H<br>skimmer<br>cone (100<br>cycles/run) | 2.90             | 0.864892                                 | 0.000011  | 0.467129                                 | 0.000006  | 2.140752                                 | 0.000017  | 0.864879                                 | 0.000009  | 0.05                                          | 0.13      | 0.00                                          | 0.10      |
|                                                                       | 2.91             | 0.864880                                 | 0.000011  | 0.467122                                 | 0.000005  | 2.140773                                 | 0.000016  | 0.864876                                 | 0.000009  | -0.09                                         | 0.13      | -0.04                                         | 0.10      |
|                                                                       | 2.92             | 0.864886                                 | 0.000012  | 0.467125                                 | 0.000005  | 2.140765                                 | 0.000015  | 0.864878                                 | 0.000009  | -0.03                                         | 0.14      | -0.01                                         | 0.10      |
|                                                                       | 2.96             | 0.864888                                 | 0.000012  | 0.467130                                 | 0.000006  | 2.140750                                 | 0.000017  | 0.864874                                 | 0.000009  | 0.00                                          | 0.14      | -0.06                                         | 0.10      |
|                                                                       | 2.96             | 0.864881                                 | 0.000011  | 0.467128                                 | 0.000005  | 2.140756                                 | 0.000015  | 0.864870                                 | 0.000009  | -0.08                                         | 0.12      | -0.10                                         | 0.10      |
|                                                                       | 2.94             | 0.864894                                 | 0.000011  | 0.467128                                 | 0.000006  | 2.140756                                 | 0.000017  | 0.864883                                 | 0.000009  | 0.06                                          | 0.13      | 0.04                                          | 0.10      |
|                                                                       | 2.97             | 0.864899                                 | 0.000012  | 0.467133                                 | 0.000005  | 2.140740                                 | 0.000016  | 0.864881                                 | 0.000009  | 0.12                                          | 0.14      | 0.02                                          | 0.10      |
|                                                                       | 2.96             | 0.864889                                 | 0.000013  | 0.467124                                 | 0.000006  | 2.140767                                 | 0.000018  | 0.864882                                 | 0.000009  | 0.01                                          | 0.15      | 0.03                                          | 0.10      |
|                                                                       | 2.95             | 0.864895                                 | 0.000010  | 0.467127                                 | 0.000005  | 2.140758                                 | 0.000015  | 0.864885                                 | 0.000009  | 0.08                                          | 0.12      | 0.07                                          | 0.10      |
|                                                                       | 2.95             | 0.864879                                 | 0.000011  | 0.467121                                 | 0.000005  | 2.140777                                 | 0.000015  | 0.864877                                 | 0.000009  | -0.10                                         | 0.13      | -0.03                                         | 0.10      |
|                                                                       | 2.94             | 0.864875                                 | 0.000009  | 0.467122                                 | 0.000005  | 2.140773                                 | 0.000015  | 0.864870                                 | 0.000009  | -0.15                                         | 0.10      | -0.10                                         | 0.10      |
|                                                                       | 2.97             | 0.864886                                 | 0.000013  | 0.467126                                 | 0.000005  | 2.140760                                 | 0.000016  | 0.864877                                 | 0.000009  | -0.02                                         | 0.15      | -0.03                                         | 0.10      |
|                                                                       | 2.94             | 0.864881                                 | 0.000012  | 0.467124                                 | 0.000006  | 2.140768                                 | 0.000017  | 0.864875                                 | 0.000009  | -0.08                                         | 0.13      | -0.05                                         | 0.10      |
|                                                                       | 2.93             | 0.864888                                 | 0.000012  | 0.467124                                 | 0.000005  | 2.140767                                 | 0.000016  | 0.864882                                 | 0.000009  | 0.00                                          | 0.13      | 0.03                                          | 0.10      |
|                                                                       | 2.83             | 0.864900                                 | 0.000012  | 0.467129                                 | 0.000005  | 2.140753                                 | 0.000015  | 0.864888                                 | 0.000009  | 0.14                                          | 0.14      | 0.11                                          | 0.10      |
|                                                                       | 2.83             | 0.864892                                 | 0.000012  | 0.467127                                 | 0.000005  | 2.140758                                 | 0.000017  | 0.864882                                 | 0.000009  | 0.05                                          | 0.14      | 0.03                                          | 0.10      |
|                                                                       | 2.75             | 0.864894                                 | 0.000011  | 0.467128                                 | 0.000005  | 2.140755                                 | 0.000016  | 0.864883                                 | 0.000009  | 0.07                                          | 0.13      | 0.04                                          | 0.10      |
| 2.62                                                                  | 0.864885         | 0.000015                                 | 0.467122  | 0.000007                                 | 2.140773  | 0.000021                                 | 0.864881  | 0.000009                                 | -0.03     | 0.17                                          | 0.02      | 0.10                                          |           |
| 2.61                                                                  | 0.864889         | 0.000013                                 | 0.467126  | 0.000006                                 | 2.140762  | 0.000017                                 | 0.864880  | 0.000009                                 | 0.01      | 0.15                                          | 0.01      | 0.10                                          |           |
| Mean                                                                  |                  | 0.864888                                 |           |                                          |           |                                          |           | 0.864879                                 |           | 0.00                                          |           | 0.00                                          |           |
| $2\sigma$ SD (n = 19)                                                 |                  | 0.000014                                 |           |                                          |           |                                          |           | 0.000009                                 |           | 0.16                                          |           | 0.11                                          |           |
| Standard<br>sample<br>cone + X<br>skimmer<br>cone (100<br>cycles/run) | 5.73             | 0.864891                                 | 0.000009  | 0.467133                                 | 0.000004  | 2.140741                                 | 0.000012  | 0.864874                                 | 0.000007  | 0.05                                          | 0.10      | 0.02                                          | 0.08      |
|                                                                       | 5.50             | 0.864885                                 | 0.000011  | 0.467129                                 | 0.000004  | 2.140752                                 | 0.000012  | 0.864872                                 | 0.000007  | -0.02                                         | 0.13      | 0.00                                          | 0.08      |
|                                                                       | 5.63             | 0.864892                                 | 0.000009  | 0.467132                                 | 0.000004  | 2.140743                                 | 0.000013  | 0.864876                                 | 0.000007  | 0.06                                          | 0.11      | 0.04                                          | 0.08      |
|                                                                       | 5.63             | 0.864885                                 | 0.000010  | 0.467129                                 | 0.000004  | 2.140751                                 | 0.000012  | 0.864872                                 | 0.000007  | -0.02                                         | 0.11      | 0.00                                          | 0.08      |
|                                                                       | 5.73             | 0.864889                                 | 0.000008  | 0.467131                                 | 0.000004  | 2.140746                                 | 0.000012  | 0.864874                                 | 0.000007  | 0.02                                          | 0.10      | 0.02                                          | 0.08      |
|                                                                       | 5.51             | 0.864885                                 | 0.000011  | 0.467129                                 | 0.000004  | 2.140752                                 | 0.000011  | 0.864873                                 | 0.000007  | -0.02                                         | 0.13      | 0.00                                          | 0.08      |
|                                                                       | 5.79             | 0.864886                                 | 0.000008  | 0.467129                                 | 0.000004  | 2.140751                                 | 0.000012  | 0.864873                                 | 0.000007  | -0.01                                         | 0.09      | 0.00                                          | 0.08      |
|                                                                       | 5.72             | 0.864885                                 | 0.000008  | 0.467131                                 | 0.000003  | 2.140747                                 | 0.000010  | 0.864870                                 | 0.000007  | -0.03                                         | 0.09      | -0.02                                         | 0.08      |
|                                                                       | 5.66             | 0.864887                                 | 0.000009  | 0.467132                                 | 0.000004  | 2.140744                                 | 0.000011  | 0.864871                                 | 0.000007  | 0.00                                          | 0.10      | -0.02                                         | 0.08      |
|                                                                       | 5.72             | 0.864885                                 | 0.000008  | 0.467130                                 | 0.000003  | 2.140748                                 | 0.000010  | 0.864871                                 | 0.000007  | -0.02                                         | 0.09      | -0.02                                         | 0.08      |
|                                                                       | 5.80             | 0.864891                                 | 0.000009  | 0.467132                                 | 0.000004  | 2.140742                                 | 0.000011  | 0.864875                                 | 0.000007  | 0.05                                          | 0.10      | 0.03                                          | 0.08      |
|                                                                       | 5.66             | 0.864886                                 | 0.000009  | 0.467133                                 | 0.000004  | 2.140739                                 | 0.000012  | 0.864868                                 | 0.000007  | -0.01                                         | 0.10      | -0.05                                         | 0.08      |
|                                                                       | 5.79             | 0.864886                                 | 0.000007  | 0.467130                                 | 0.000004  | 2.140748                                 | 0.000011  | 0.864872                                 | 0.000007  | -0.02                                         | 0.08      | -0.01                                         | 0.08      |
| 5.72                                                                  | 0.864887         | 0.000008                                 | 0.467132  | 0.000003                                 | 2.140743  | 0.000011                                 | 0.864871  | 0.000007                                 | 0.00      | 0.09                                          | -0.02     | 0.08                                          |           |

|                |       |          |          |          |          |          |          |          |          |       |      |       |      |
|----------------|-------|----------|----------|----------|----------|----------|----------|----------|----------|-------|------|-------|------|
|                | 5.75  | 0.864889 | 0.000009 | 0.467130 | 0.000004 | 2.140749 | 0.000013 | 0.864875 | 0.000007 | 0.02  | 0.10 | 0.03  | 0.08 |
|                | 5.75  | 0.864885 | 0.000008 | 0.467131 | 0.000004 | 2.140746 | 0.000012 | 0.864870 | 0.000007 | -0.02 | 0.10 | -0.03 | 0.08 |
|                | 5.79  | 0.864888 | 0.000008 | 0.467130 | 0.000004 | 2.140750 | 0.000011 | 0.864875 | 0.000007 | 0.01  | 0.09 | 0.03  | 0.08 |
|                | 5.76  | 0.864883 | 0.000008 | 0.467128 | 0.000003 | 2.140755 | 0.000011 | 0.864872 | 0.000007 | -0.05 | 0.09 | -0.01 | 0.08 |
|                | 5.72  | 0.864889 | 0.000008 | 0.467131 | 0.000004 | 2.140746 | 0.000011 | 0.864874 | 0.000007 | 0.03  | 0.09 | 0.02  | 0.08 |
| Mean           |       | 0.864887 |          |          |          |          |          | 0.864873 |          | 0.00  |      | 0.00  |      |
| 2σ SD (n = 19) |       | 0.000005 |          |          |          |          |          | 0.000004 |          | 0.06  |      | 0.05  |      |
|                | 9.49  | 0.864911 | 0.000008 | 0.467136 | 0.000003 | 2.140730 | 0.000009 | 0.864890 | 0.000006 | -0.02 | 0.09 | -0.01 | 0.07 |
|                | 9.43  | 0.864910 | 0.000006 | 0.467135 | 0.000003 | 2.140732 | 0.000009 | 0.864889 | 0.000006 | -0.04 | 0.07 | -0.02 | 0.07 |
|                | 9.53  | 0.864912 | 0.000008 | 0.467137 | 0.000005 | 2.140728 | 0.000014 | 0.864890 | 0.000006 | -0.01 | 0.10 | -0.01 | 0.07 |
|                | 9.68  | 0.864907 | 0.000006 | 0.467134 | 0.000003 | 2.140738 | 0.000009 | 0.864889 | 0.000006 | -0.07 | 0.06 | -0.03 | 0.07 |
|                | 9.74  | 0.864919 | 0.000009 | 0.467142 | 0.000008 | 2.140712 | 0.000024 | 0.864890 | 0.000006 | 0.07  | 0.11 | -0.01 | 0.07 |
|                | 9.77  | 0.864916 | 0.000008 | 0.467139 | 0.000005 | 2.140722 | 0.000015 | 0.864892 | 0.000006 | 0.04  | 0.09 | 0.01  | 0.07 |
|                | 9.84  | 0.864913 | 0.000008 | 0.467137 | 0.000004 | 2.140726 | 0.000012 | 0.864890 | 0.000006 | 0.00  | 0.09 | -0.01 | 0.07 |
|                | 9.90  | 0.864910 | 0.000006 | 0.467137 | 0.000003 | 2.140729 | 0.000008 | 0.864888 | 0.000006 | -0.03 | 0.07 | -0.03 | 0.07 |
|                | 9.94  | 0.864915 | 0.000005 | 0.467137 | 0.000003 | 2.140727 | 0.000008 | 0.864892 | 0.000006 | 0.02  | 0.06 | 0.01  | 0.07 |
|                | 10.01 | 0.864910 | 0.000006 | 0.467134 | 0.000003 | 2.140735 | 0.000009 | 0.864891 | 0.000006 | -0.03 | 0.07 | 0.00  | 0.07 |
|                | 10.00 | 0.864915 | 0.000006 | 0.467135 | 0.000003 | 2.140733 | 0.000009 | 0.864894 | 0.000006 | 0.02  | 0.07 | 0.04  | 0.07 |
|                | 10.04 | 0.864911 | 0.000006 | 0.467135 | 0.000003 | 2.140733 | 0.000008 | 0.864891 | 0.000006 | -0.02 | 0.07 | 0.00  | 0.07 |
|                | 10.10 | 0.864914 | 0.000009 | 0.467137 | 0.000006 | 2.140727 | 0.000018 | 0.864891 | 0.000006 | 0.01  | 0.10 | 0.00  | 0.07 |
|                | 9.97  | 0.864909 | 0.000006 | 0.467132 | 0.000003 | 2.140744 | 0.000009 | 0.864893 | 0.000006 | -0.05 | 0.07 | 0.02  | 0.07 |
|                | 10.12 | 0.864912 | 0.000009 | 0.467137 | 0.000006 | 2.140728 | 0.000019 | 0.864890 | 0.000006 | -0.01 | 0.11 | -0.01 | 0.07 |
|                | 10.15 | 0.864917 | 0.000006 | 0.467139 | 0.000003 | 2.140721 | 0.000008 | 0.864892 | 0.000006 | 0.05  | 0.07 | 0.01  | 0.07 |
|                | 10.11 | 0.864919 | 0.000008 | 0.467138 | 0.000005 | 2.140724 | 0.000015 | 0.864895 | 0.000006 | 0.06  | 0.09 | 0.04  | 0.07 |
|                | 10.20 | 0.864913 | 0.000006 | 0.467136 | 0.000003 | 2.140731 | 0.000008 | 0.864892 | 0.000006 | 0.00  | 0.07 | 0.01  | 0.07 |
|                | 10.36 | 0.864913 | 0.000006 | 0.467136 | 0.000003 | 2.140730 | 0.000008 | 0.864891 | 0.000006 | 0.00  | 0.07 | 0.00  | 0.07 |
| Mean           |       | 0.864913 |          |          |          |          |          | 0.864891 |          | 0.00  |      | 0.00  |      |
| 2σ SD (n = 19) |       | 0.000006 |          |          |          |          |          | 0.000003 |          | 0.08  |      | 0.04  |      |
|                | 5.38  | 0.864890 | 0.000003 | 0.467125 | 0.000002 | 2.140764 | 0.000005 | 0.864882 | 0.000002 | 0.01  | 0.04 | 0.01  | 0.03 |
|                | 5.32  | 0.864886 | 0.000003 | 0.467124 | 0.000002 | 2.140766 | 0.000005 | 0.864879 | 0.000003 | -0.03 | 0.04 | -0.02 | 0.03 |
|                | 5.49  | 0.864889 | 0.000003 | 0.467125 | 0.000002 | 2.140763 | 0.000005 | 0.864882 | 0.000003 | 0.01  | 0.04 | 0.01  | 0.03 |
|                | 5.26  | 0.864890 | 0.000003 | 0.467124 | 0.000002 | 2.140767 | 0.000005 | 0.864883 | 0.000002 | 0.02  | 0.04 | 0.02  | 0.03 |
|                | 5.34  | 0.864886 | 0.000003 | 0.467123 | 0.000002 | 2.140769 | 0.000005 | 0.864881 | 0.000003 | -0.03 | 0.04 | -0.01 | 0.03 |
|                | 5.26  | 0.864890 | 0.000004 | 0.467125 | 0.000002 | 2.140766 | 0.000005 | 0.864884 | 0.000003 | 0.02  | 0.04 | 0.04  | 0.03 |
|                | 5.15  | 0.864890 | 0.000003 | 0.467125 | 0.000002 | 2.140763 | 0.000005 | 0.864882 | 0.000002 | 0.01  | 0.04 | 0.01  | 0.03 |
|                | 5.15  | 0.864891 | 0.000003 | 0.467126 | 0.000002 | 2.140760 | 0.000005 | 0.864882 | 0.000003 | 0.03  | 0.04 | 0.01  | 0.03 |
|                | 5.15  | 0.864886 | 0.000004 | 0.467125 | 0.000002 | 2.140764 | 0.000005 | 0.864879 | 0.000003 | -0.03 | 0.04 | -0.03 | 0.03 |
|                | 5.15  | 0.864887 | 0.000004 | 0.467126 | 0.000002 | 2.140760 | 0.000005 | 0.864878 | 0.000003 | -0.02 | 0.04 | -0.04 | 0.03 |
|                | 5.50  | 0.864890 | 0.000003 | 0.467126 | 0.000002 | 2.140761 | 0.000005 | 0.864881 | 0.000003 | 0.01  | 0.04 | 0.00  | 0.03 |
|                | 5.28  | 0.864888 | 0.000003 | 0.467125 | 0.000002 | 2.140765 | 0.000005 | 0.864881 | 0.000003 | 0.00  | 0.04 | 0.00  | 0.03 |
| Mean           |       | 0.864889 |          |          |          |          |          | 0.864881 |          | 0.00  |      | 0.00  |      |
| 2σ SD          |       | 0.000004 |          |          |          |          |          | 0.000004 |          | 0.04  |      | 0.04  |      |



**Table S2. Experimental slopes of three-isotope plot obtained from measured W isotopic ratios for Alfa Aesar W standards.**

| Date       | Data points | ln r <sup>182/184</sup> vs. ln r <sup>186/184</sup> |          |                | ln r <sup>182/183</sup> vs. ln r <sup>186/183</sup> |          |                |
|------------|-------------|-----------------------------------------------------|----------|----------------|-----------------------------------------------------|----------|----------------|
|            |             | $\beta$                                             | $\sigma$ | r <sup>2</sup> | $\beta$                                             | $\sigma$ | r <sup>2</sup> |
| 2017.07.26 | 6           | -1.04961                                            | 0.03191  | 0.99632        | -0.29601                                            | 0.03636  | 0.94308        |
| 2017.07.27 | 11          | -1.00599                                            | 0.00082  | 0.99999        | -0.33547                                            | 0.000901 | 0.99994        |
| 2017.07.28 | 8           | -1.00191                                            | 0.00442  | 0.99988        | -0.32613                                            | 0.0052   | 0.99848        |
| 2017.07.29 | 6           | -1.02186                                            | 0.01341  | 0.99931        | -0.32966                                            | 0.01768  | 0.98862        |
| 2017.07.30 | 11          | -1.00881                                            | 0.00537  | 0.99974        | -0.30552                                            | 0.01049  | 0.98951        |
| 2017.12.29 | 10          | -0.99941                                            | 0.00203  | 0.99997        | -0.31596                                            | 0.00658  | 0.99654        |
| 2017.12.30 | 9           | -1.00092                                            | 0.00412  | 0.99988        | -0.32609                                            | 0.00296  | 0.99942        |
| 2018.01.09 | 8           | -1.014                                              | 0.00448  | 0.99988        | -0.32555                                            | 0.00313  | 0.99945        |
| 2018.01.11 | 8           | -0.99558                                            | 0.00383  | 0.99991        | -0.32149                                            | 0.00428  | 0.99894        |
| 2018.01.12 | 5           | -1.00919                                            | 0.01937  | 0.9989         | -0.3246                                             | 0.0075   | 0.9984         |
| 2018.01.14 | 10          | -1.04389                                            | 0.00813  | 0.99951        | -0.34549                                            | 0.003    | 0.9994         |
| 2018.01.15 | 9           | -0.99937                                            | 0.00194  | 0.99997        | -0.33388                                            | 0.000682 | 0.99997        |
